# Supplementary material for: A renewable glucose-derived methacrylate monomer for photopolymerization: synthesis, copolymerization with MMA, and structure–property relationships
Source: Royal Society of Chemistry journal article supplement (doi:10.1039/d6ra01987k), 2026-04-24
Supplement: d6ra01987k1.pdf [file d6ra01987k1.pdf]

## Renewable Sugar-Based Methacrylate Monomer for Photopolymer Application: Synthesis and Copolymerization with MMA

Rabia Nur ÜN<sup>1\*</sup>, Fehmi SALTAN<sup>2</sup>, Gökhan KÖK<sup>1</sup>

<sup>1</sup>Ege University, Department of Chemistry, Faculty of Science, İzmir, Turkey

<sup>2</sup>Cankiri Karatekin University, Department of Chemistry, Faculty of Science, Çankırı, Turkey

[rabia.un@ege.edu.tr](mailto:rabia.un@ege.edu.tr)

### SUPPORTING INFORMATION

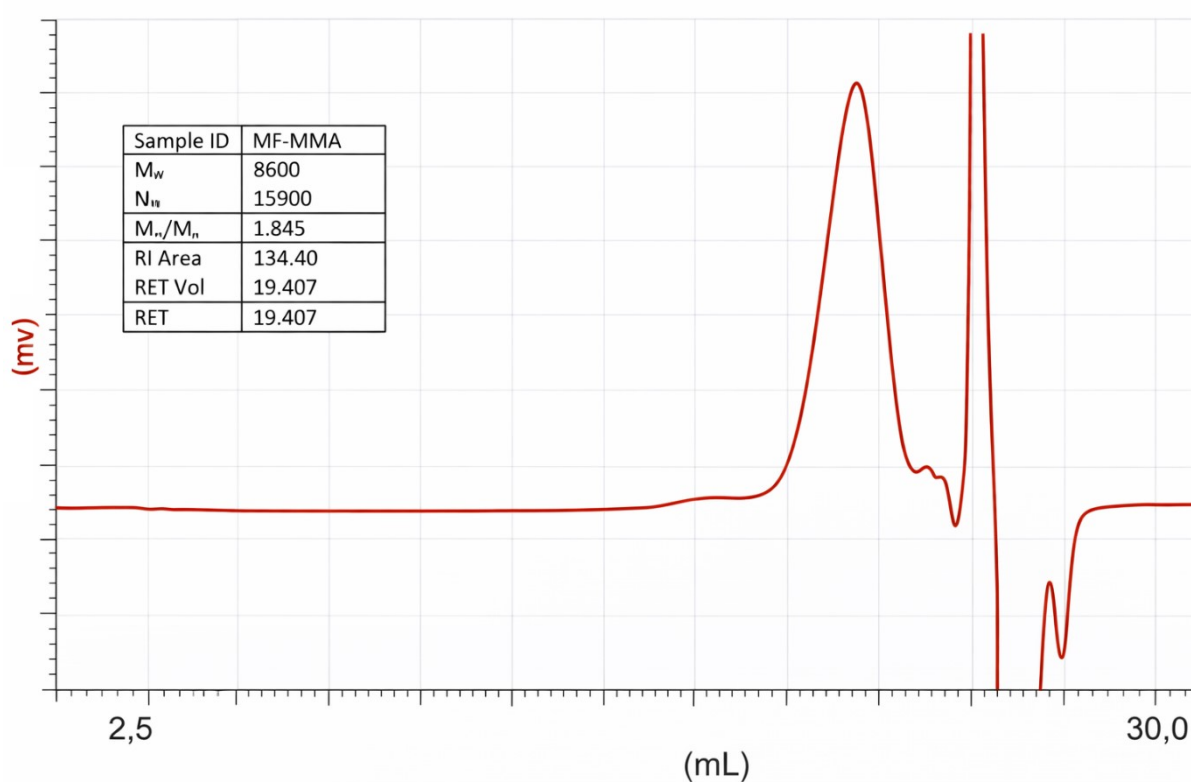

**Figure S1.** GPC chromatogram of the GF-MMA copolymer showing molecular weight distribution (M<sub>w</sub>, M<sub>n</sub>, and PDI values).

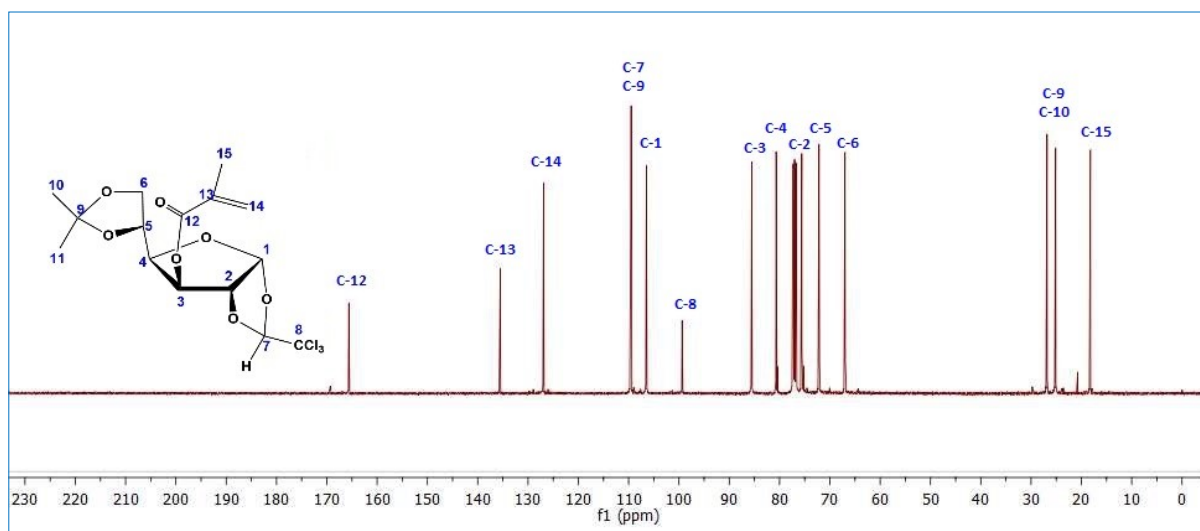

**Figure S2.**  $^{13}\text{C}$ -NMR spectra of the MA-IPT-GF monomer
